# Supplementary material for: Increased Expression of Sox9 during Balance of BMSCs/Chondrocyte Bricks in Platelet-Rich Plasma Promotes Construction of a Stable 3-D Chondrogenesis Microenvironment for BMSCs
Source: Hindawi journal article supplement (doi:10.1155/2020/5492059), 2020-05-26
Supplement: f1 [file 5492059.f1.pdf]

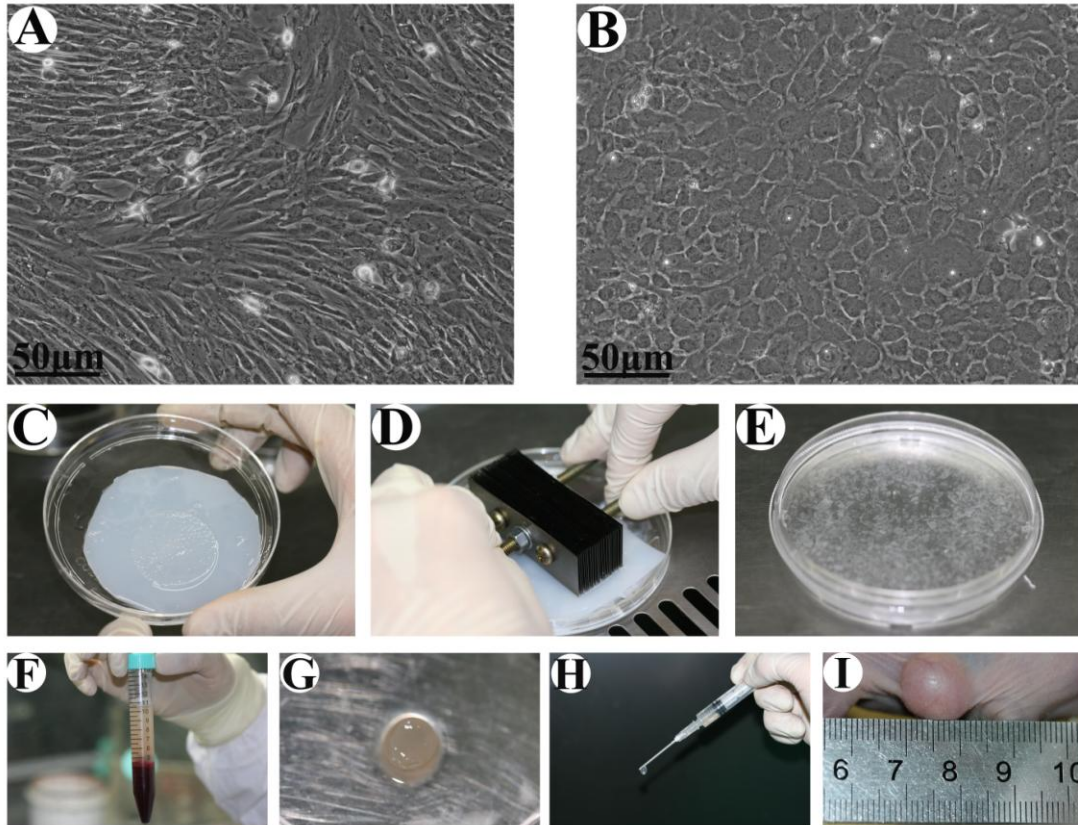

Supplementary Fig.1. **Preparation of constructs and animal experiments:** (A) BMSCs. (B) Chondrocytes. (C-E) Process of achieving chondrocyte bricks. (F) Process of making PRP. (G) Constructs of cell complex with PRP before transplantation. (H-I) Subcutaneous injection.
